# Supplementary material for: Diabetes-related changes in the protein composition and the biomechanical properties of human retinal vascular basement membranes
Source: PLoS One. 2017 Dec 28;12(12):e0189857. doi: 10.1371/journal.pone.0189857 (PMC5746242; doi:10.1371/journal.pone.0189857)
Supplement: S1 Table — Sheet A: List of all proteins detected. Sheet B: List of the ECM proteins only and their relative concentrations in % and pie-chart. (XLSX) [file pone.0189857.s001.xlsx]

## Sheet: Sheet A
Accession	Description	ΣCoverage	Σ# Proteins	Σ# Unique Peptides	Σ# Peptides	Σ# PSMs	Area	Score A2	Coverage A2	# Peptides A2	# PSM A2	Score A4	Coverage A4	# Peptides A4	# PSM A4	# AAs	MW [kDa]	calc. pI
Q9GZM7	RecName: Full=Tubulointerstitial nephritis antigen-like;AltName: Full=Glucocorticoid-inducible protein 5;AltName: Full=Oxidized LDL-responsive gene 2 protein; Short=OLRG-2;AltName: Full=Tubulointerstitial nephritis antigen-related protein; Short=TIN Ag-related protein; Short=TIN-Ag-RP;Flags: Precursor; - [TINAL_HUMAN]	38.33	1	12	12	155	2.52811e+09	291.092	38.33	12	76	3628.87	34.9	11	79	467	52.353	6.99072
P11047	RecName: Full=Laminin subunit gamma-1;AltName: Full=Laminin B2 chain;AltName: Full=Laminin-1 subunit gamma;AltName: Full=Laminin-10 subunit gamma;AltName: Full=Laminin-11 subunit gamma;AltName: Full=Laminin-2 subunit gamma;AltName: Full=Laminin-3 subunit gamma;AltName: Full=Laminin-4 subunit gamma;AltName: Full=Laminin-6 subunit gamma;AltName: Full=Laminin-7 subunit gamma;AltName: Full=Laminin-8 …	33.25	1	38	38	444	1512931951	857.535	32.38	36	226	8680.51	33.25	38	218	1609	177.489	5.12256
P55268	RecName: Full=Laminin subunit beta-2;AltName: Full=Laminin B1s chain;AltName: Full=Laminin-11 subunit beta;AltName: Full=Laminin-14 subunit beta;AltName: Full=Laminin-15 subunit beta;AltName: Full=Laminin-3 subunit beta;AltName: Full=Laminin-4 subunit beta;AltName: Full=Laminin-7 subunit beta;AltName: Full=Laminin-9 subunit beta;AltName: Full=S-laminin subunit beta; Short=S-LAM beta;Flags: Precur…	33.09	2	38	38	301	1.16829e+09	527.269	30.14	33	143	5721.26	28.25	32	158	1798	195.854	6.52197
P98160	RecName: Full=Basement membrane-specific heparan sulfate proteoglycan core protein; Short=HSPG;AltName: Full=Perlecan; Short=PLC;Contains: RecName: Full=Endorepellin;Contains: RecName: Full=LG3 peptide;Flags: Precursor; - [PGBM_HUMAN]	16.92	1	45	45	346	1.10592e+09	697.601	16.03	39	173	7049.51	15.37	41	173	4391	468.532	6.50732
P02452	RecName: Full=Collagen alpha-1(I) chain;AltName: Full=Alpha-1 type I collagen;Flags: Precursor; - [CO1A1_HUMAN]	1.43	1	3	3	22	7.4198e+08	27.1475	0.82	1	9	319.062	1.43	3	13	1464	138.857	5.79541
Q8NFW8	N-acylneuraminate cytidylyltransferase OS=Homo sapiens GN=CMAS PE=1 SV=2 - [NEUA_HUMAN]	1.38	1	1	1	4	648045170		0			95.3933	1.38	1	4	434	48.3487	7.92822
P04264	RecName: Full=Keratin, type II cytoskeletal 1;AltName: Full=67 kDa cytokeratin;AltName: Full=Cytokeratin-1; Short=CK-1;AltName: Full=Hair alpha protein;AltName: Full=Keratin-1; Short=K1;AltName: Full=Type-II keratin Kb1; - [K2C1_HUMAN]	30.28	5	20	21	131	5.37434e+08	231.187	28.57	19	64	2397.08	28.73	20	67	644	65.999	8.11865
P02462	RecName: Full=Collagen alpha-1(IV) chain;Contains: RecName: Full=Arresten;Flags: Precursor; - [CO4A1_HUMAN]	4.43	2	5	5	32	4.64865e+08	62.3019	3.83	4	15	736.578	4.43	5	17	1669	160.514	8.27979
P35527	RecName: Full=Keratin, type I cytoskeletal 9;AltName: Full=Cytokeratin-9; Short=CK-9;AltName: Full=Keratin-9; Short=K9; - [K1C9_HUMAN]	26.65	1	12	12	80	4.04881e+08	169.411	24.72	11	38	1830.77	25.52	11	42	623	62.0268	5.23682
O15230	RecName: Full=Laminin subunit alpha-5;AltName: Full=Laminin-10 subunit alpha;AltName: Full=Laminin-11 subunit alpha;AltName: Full=Laminin-15 subunit alpha;Flags: Precursor; - [LAMA5_HUMAN]	11.96	1	26	27	167	3.57791e+08	334.253	11.07	24	86	3341.38	11.47	26	81	3695	399.479	7.02002
Q96RJ6	RecName: Full=Fer3-like protein;AltName: Full=Basic helix-loop-helix protein N-twist;AltName: Full=Class A basic helix-loop-helix protein 31; Short=bHLHa31;AltName: Full=Nephew of atonal 3;AltName: Full=Neuronal twist; - [FER3L_HUMAN]	7.23	1	1	1	2	3.20332e+08	6.43066	7.23	1	2		0			166	19.0046	5.14795
P12111	RecName: Full=Collagen alpha-3(VI) chain;Flags: Precursor; - [CO6A3_HUMAN]	5.85	1	15	15	110	2.9404e+08	195.883	5.1	12	47	2660.72	5	14	63	3177	343.457	6.68311
Q01955	RecName: Full=Collagen alpha-3(IV) chain;AltName: Full=Goodpasture antigen;Contains: RecName: Full=Tumstatin;Flags: Precursor; - [CO4A3_HUMAN]	2.46	1	1	2	4	2.86555e+08	5.04949	1.86	1	1	105.715	2.46	2	3	1670	161.711	9.15869
P14543	RecName: Full=Nidogen-1; Short=NID-1;AltName: Full=Entactin;Flags: Precursor; - [NID1_HUMAN]	7.46	1	9	9	75	2.56186e+08	137.082	7.46	9	40	1281.7	7.46	9	35	1247	136.291	5.2876
P21810	RecName: Full=Biglycan;AltName: Full=Bone/cartilage proteoglycan I;AltName: Full=PG-S1;Flags: Precursor; - [PGS1_HUMAN]	8.15	1	3	3	9	2.3742e+08	11.989	5.71	2	4	209.472	8.15	3	5	368	41.6275	7.51807
P12109	RecName: Full=Collagen alpha-1(VI) chain;Flags: Precursor; - [CO6A1_HUMAN]	22.08	1	14	14	77	2.1697e+08	138.238	22.08	14	37	1503.28	19.84	13	40	1028	108.462	5.42725
P07477	RecName: Full=Trypsin-1; EC=3.4.21.4;AltName: Full=Beta-trypsin;AltName: Full=Cationic trypsinogen;AltName: Full=Serine protease 1;AltName: Full=Trypsin I;Contains: RecName: Full=Alpha-trypsin chain 1;Contains: RecName: Full=Alpha-trypsin chain 2;Flags: Precursor; - [TRY1_HUMAN]	4.05	1	1	1	18	1.90116e+08	26.4003	4.05	1	9	259.968	4.05	1	9	247	26.5411	6.50732
Q14112	RecName: Full=Nidogen-2; Short=NID-2;AltName: Full=Osteonidogen;Flags: Precursor; - [NID2_HUMAN]	10.11	1	9	9	57	1.89169e+08	107.596	8.51	8	26	1087.94	10.11	9	31	1375	151.158	5.2876
P12110	RecName: Full=Collagen alpha-2(VI) chain;Flags: Precursor; - [CO6A2_HUMAN]	11.19	1	11	11	34	1.8716e+08	59.511	9.32	8	18	479.937	7.56	7	16	1019	108.512	6.21436
P04259	RecName: Full=Keratin, type II cytoskeletal 6B;AltName: Full=Cytokeratin-6B; Short=CK-6B;AltName: Full=Keratin-6B; Short=K6B;AltName: Full=Type-II keratin Kb10; - [K2C6B_HUMAN]	5.5	8	2	3	21	1.69946e+08	31.0959	5.5	3	10	500.927	5.5	3	11	564	60.0303	8.00146
Q2TAA5	GDP-Man:Man(3)GlcNAc(2)-PP-Dol alpha-1,2-mannosyltransferase OS=Homo sapiens GN=ALG11 PE=1 SV=2 - [ALG11_HUMAN]	2.44	1	1	1	3	166289019		0			72.6515	2.44	1	3	492	55.6149	8.48486
Q14746	RecName: Full=Conserved oligomeric Golgi complex subunit 2; Short=COG complex subunit 2;AltName: Full=Component of oligomeric Golgi complex 2;AltName: Full=Low density lipoprotein receptor defect C-complementing protein; - [COG2_HUMAN]	2.17	1	1	1	2	165853036	5.01069	2.17	1	2		0			738	83.1553	6.62451
Q00604	RecName: Full=Norrin;AltName: Full=Norrie disease protein;AltName: Full=X-linked exudative vitreoretinopathy 2 protein;Flags: Precursor; - [NDP_HUMAN]	9.77	1	1	1	1	1.35353e+08	4.84843	9.77	1	1		0			133	15.0333	8.82178
Q9Y4D2	Sn1-specific diacylglycerol lipase alpha OS=Homo sapiens GN=DAGLA PE=1 SV=3 - [DGLA_HUMAN]	0.96	1	1	1	1	134398449		0			44.63	0.96	1	1	1042	114.879	6.354
P08572	RecName: Full=Collagen alpha-2(IV) chain;Contains: RecName: Full=Canstatin;Flags: Precursor; - [CO4A2_HUMAN]	3.86	1	4	4	29	1.13588e+08	53.2112	1.75	2	12	711.957	3.86	4	17	1712	167.449	8.66064
P13645	RecName: Full=Keratin, type I cytoskeletal 10;AltName: Full=Cytokeratin-10; Short=CK-10;AltName: Full=Keratin-10; Short=K10; - [K1C10_HUMAN]	15.92	2	6	7	27	1.07526e+08	56.4877	15.92	7	15	525.783	15.92	6	12	584	58.7917	5.21143
O00468	RecName: Full=Agrin;Contains: RecName: Full=Agrin N-terminal 110 kDa subunit;Contains: RecName: Full=Agrin C-terminal 110 kDa subunit;Contains: RecName: Full=Agrin C-terminal 90 kDa fragment; Short=C90;Contains: RecName: Full=Agrin C-terminal 22 kDa fragment; Short=C22;Flags: Precursor; - [AGRIN_HUMAN]	1.6	1	3	3	11	1.03875e+08	19.4206	1.21	2	5	306.512	1.6	3	6	2067	217.092	6.39209
P05997	RecName: Full=Collagen alpha-2(V) chain;Flags: Precursor; - [CO5A2_HUMAN]	0.8	1	1	1	8	9.99282e+07	8.26958	0.8	1	3	208.969	0.8	1	5	1499	144.821	6.45557
P41222	RecName: Full=Prostaglandin-H2 D-isomerase; EC=5.3.99.2;AltName: Full=Beta-trace protein;AltName: Full=Cerebrin-28;AltName: Full=Glutathione-independent PGD synthase;AltName: Full=Lipocalin-type prostaglandin-D synthase;AltName: Full=Prostaglandin-D2 synthase; Short=PGD2 synthase; Short=PGDS; Short=PGDS2;Flags: Precursor; - [PTGDS_HUMAN]	8.95	1	1	1	2	75455965	3.56565	8.95	1	1	85.16	8.95	1	1	190	21.0153	7.79639
P24043	RecName: Full=Laminin subunit alpha-2;AltName: Full=Laminin M chain;AltName: Full=Laminin-12 subunit alpha;AltName: Full=Laminin-2 subunit alpha;AltName: Full=Laminin-4 subunit alpha;AltName: Full=Merosin heavy chain;Flags: Precursor; - [LAMA2_HUMAN]	1.09	1	2	2	15	6.40206e+07	25.6918	1.09	2	7	429.929	1.09	2	8	3122	343.684	6.40479
Q05707	RecName: Full=Collagen alpha-1(XIV) chain;AltName: Full=Undulin;Flags: Precursor; - [COEA1_HUMAN]	2.45	1	3	3	18	3.99468e+07	31.5296	2.45	3	10	280.267	1.45	2	8	1796	193.394	5.30029
P08727	RecName: Full=Keratin, type I cytoskeletal 19;AltName: Full=Cytokeratin-19; Short=CK-19;AltName: Full=Keratin-19; Short=K19; - [K1C19_HUMAN]	4.5	6	1	2	6	3.85905e+07	8.57928	4.5	2	3	100.149	4.5	2	3	400	44.0791	5.13525
Q9NSB2	RecName: Full=Keratin, type II cuticular Hb4;AltName: Full=Keratin-84; Short=K84;AltName: Full=Type II hair keratin Hb4;AltName: Full=Type-II keratin Kb24; - [KRT84_HUMAN]	7	1	3	3	14	3.52198e+07	22.9131	7	3	7	361.372	7	3	7	600	64.8015	7.56201
P53420	RecName: Full=Collagen alpha-4(IV) chain;Flags: Precursor; - [CO4A4_HUMAN]	1.48	1	2	2	6	33976680	9.45062	1.48	2	3	129.268	1.48	2	3	1690	163.934	8.6167
P02458	Collagen alpha-1(II) chain OS=Homo sapiens GN=COL2A1 PE=1 SV=3 - [CO2A1_HUMAN]	0.61	1	1	1	1	3.19732e+07		0			48.95	0.61	1	1	1487	141.699	6.91748
Q14055	RecName: Full=Collagen alpha-2(IX) chain;Flags: Precursor; - [CO9A2_HUMAN]	1.89	1	1	1	1	3.11631e+07	2.59456	1.89	1	1		0			689	65.0909	9.17334
P51884	RecName: Full=Lumican;AltName: Full=Keratan sulfate proteoglycan lumican; Short=KSPG lumican;Flags: Precursor; - [LUM_HUMAN]	4.14	1	1	1	1	2.93079e+07	2.52349	4.14	1	1		0			338	38.4048	6.60986
Q16787	RecName: Full=Laminin subunit alpha-3;AltName: Full=Epiligrin 170 kDa subunit; Short=E170;AltName: Full=Epiligrin subunit alpha;AltName: Full=Kalinin subunit alpha;AltName: Full=Laminin-5 subunit alpha;AltName: Full=Laminin-6 subunit alpha;AltName: Full=Laminin-7 subunit alpha;AltName: Full=Nicein subunit alpha;Flags: Precursor; - [LAMA3_HUMAN]	1.26	1	2	3	9	26832979	12.1978	0.84	2	4	189.36	1.26	3	5	3333	366.414	7.23975
P04004	Vitronectin OS=Homo sapiens GN=VTN PE=1 SV=1 - [VTNC_HUMAN]	3.14	1	1	1	1	2.24537e+07		0			51.2	3.14	1	1	478	54.2712	5.79541
Q9Y6J9	RecName: Full=TAF6-like RNA polymerase II p300/CBP-associated factor-associated factor 65 kDa subunit 6L;AltName: Full=PCAF-associated factor 65-alpha; Short=PAF65-alpha; - [TAF6L_HUMAN]	2.57	1	1	1	1	21673852	2.47786	2.57	1	1					622	67.772	8.96826
Q99715	RecName: Full=Collagen alpha-1(XII) chain;Flags: Precursor; - [COCA1_HUMAN]	0.59	1	1	1	3	1.76506e+07	5.18253	0.59	1	2	76.25	0.59	1	1	3063	332.941	5.52881
Q15582	RecName: Full=Transforming growth factor-beta-induced protein ig-h3; Short=Beta ig-h3;AltName: Full=Kerato-epithelin;AltName: Full=RGD-containing collagen-associated protein; Short=RGD-CAP;Flags: Precursor; - [BGH3_HUMAN]	2.78	1	1	1	2	8.05488e+06	3.2084	2.78	1	1	76.79	2.78	1	1	683	74.634	7.7085
O76011	RecName: Full=Keratin, type I cuticular Ha4;AltName: Full=Hair keratin, type I Ha4;AltName: Full=Keratin-34; Short=K34; - [KRT34_HUMAN]	8.26	1	1	1	2	0	5.13847	8.26	1	1	43.02	8.26	1	1	436	49.3922	5.05908
O94919	RecName: Full=Endonuclease domain-containing 1 protein; EC=3.1.30.-;Flags: Precursor; - [ENDD1_HUMAN]	2.8	1	1	1	1	0	2.4705	2.8	1	1		0			500	54.9813	5.70654

## Sheet: Sheet B
Accession	Description	Area	%
Q9GZM7	RecName: Full=Tubulointerstitial nephritis antigen-like;AltName: Full=Glucocorticoid-inducible protein 5;AltName: Full=Oxidized LDL-responsive gene 2 protein; Short=OLRG-2;AltName: Full=Tubulointerstitial nephritis antigen-related protein; Short=TIN Ag-related protein; Short=TIN-Ag-RP;Flags: Precursor; - [TINAL_HUMAN]	2.52811e+09	18.978
P11047	RecName: Full=Laminin subunit gamma-1;AltName: Full=Laminin B2 chain;AltName: Full=Laminin-1 subunit gamma;AltName: Full=Laminin-10 subunit gamma;AltName: Full=Laminin-11 subunit gamma;AltName: Full=Laminin-2 subunit gamma;AltName: Full=Laminin-3 subunit gamma;AltName: Full=Laminin-4 subunit gamma;AltName: Full=Laminin-6 subunit gamma;AltName: Full=Laminin-7 subunit gamma;AltName: Full=Laminin-8 …	1512931951	11.3573
P55268	RecName: Full=Laminin subunit beta-2;AltName: Full=Laminin B1s chain;AltName: Full=Laminin-11 subunit beta;AltName: Full=Laminin-14 subunit beta;AltName: Full=Laminin-15 subunit beta;AltName: Full=Laminin-3 subunit beta;AltName: Full=Laminin-4 subunit beta;AltName: Full=Laminin-7 subunit beta;AltName: Full=Laminin-9 subunit beta;AltName: Full=S-laminin subunit beta; Short=S-LAM beta;Flags: Precur…	1.16829e+09	8.77012
P98160	RecName: Full=Basement membrane-specific heparan sulfate proteoglycan core protein; Short=HSPG;AltName: Full=Perlecan; Short=PLC;Contains: RecName: Full=Endorepellin;Contains: RecName: Full=LG3 peptide;Flags: Precursor; - [PGBM_HUMAN]	1.10592e+09	8.3019
P02452	RecName: Full=Collagen alpha-1(I) chain;AltName: Full=Alpha-1 type I collagen;Flags: Precursor; - [CO1A1_HUMAN]	7.4198e+08	5.56988
P02462	RecName: Full=Collagen alpha-1(IV) chain;Contains: RecName: Full=Arresten;Flags: Precursor; - [CO4A1_HUMAN]	4.64865e+08	3.48964
O15230	RecName: Full=Laminin subunit alpha-5;AltName: Full=Laminin-10 subunit alpha;AltName: Full=Laminin-11 subunit alpha;AltName: Full=Laminin-15 subunit alpha;Flags: Precursor; - [LAMA5_HUMAN]	3.57791e+08	2.68586
P12111	RecName: Full=Collagen alpha-3(VI) chain;Flags: Precursor; - [CO6A3_HUMAN]	2.9404e+08	2.20729
Q01955	RecName: Full=Collagen alpha-3(IV) chain;AltName: Full=Goodpasture antigen;Contains: RecName: Full=Tumstatin;Flags: Precursor; - [CO4A3_HUMAN]	2.86555e+08	2.15111
P14543	RecName: Full=Nidogen-1; Short=NID-1;AltName: Full=Entactin;Flags: Precursor; - [NID1_HUMAN]	2.56186e+08	1.92314
P21810	RecName: Full=Biglycan;AltName: Full=Bone/cartilage proteoglycan I;AltName: Full=PG-S1;Flags: Precursor; - [PGS1_HUMAN]	2.3742e+08	1.78226
P12109	RecName: Full=Collagen alpha-1(VI) chain;Flags: Precursor; - [CO6A1_HUMAN]	2.1697e+08	1.62874
Q14112	RecName: Full=Nidogen-2; Short=NID-2;AltName: Full=Osteonidogen;Flags: Precursor; - [NID2_HUMAN]	1.89169e+08	1.42005
P12110	RecName: Full=Collagen alpha-2(VI) chain;Flags: Precursor; - [CO6A2_HUMAN]	1.8716e+08	1.40497
Q00604	RecName: Full=Norrin;AltName: Full=Norrie disease protein;AltName: Full=X-linked exudative vitreoretinopathy 2 protein;Flags: Precursor; - [NDP_HUMAN]	1.35353e+08	1.01607
P08572	RecName: Full=Collagen alpha-2(IV) chain;Contains: RecName: Full=Canstatin;Flags: Precursor; - [CO4A2_HUMAN]	1.13588e+08	0.852682
O00468	RecName: Full=Agrin;Contains: RecName: Full=Agrin N-terminal 110 kDa subunit;Contains: RecName: Full=Agrin C-terminal 110 kDa subunit;Contains: RecName: Full=Agrin C-terminal 90 kDa fragment; Short=C90;Contains: RecName: Full=Agrin C-terminal 22 kDa fragment; Short=C22;Flags: Precursor; - [AGRIN_HUMAN]	1.03875e+08	0.779769
P05997	RecName: Full=Collagen alpha-2(V) chain;Flags: Precursor; - [CO5A2_HUMAN]	9.99282e+07	0.75014
P24043	RecName: Full=Laminin subunit alpha-2;AltName: Full=Laminin M chain;AltName: Full=Laminin-12 subunit alpha;AltName: Full=Laminin-2 subunit alpha;AltName: Full=Laminin-4 subunit alpha;AltName: Full=Merosin heavy chain;Flags: Precursor; - [LAMA2_HUMAN]	6.40206e+07	0.480589
Q05707	RecName: Full=Collagen alpha-1(XIV) chain;AltName: Full=Undulin;Flags: Precursor; - [COEA1_HUMAN]	3.99468e+07	0.299872
P53420	RecName: Full=Collagen alpha-4(IV) chain;Flags: Precursor; - [CO4A4_HUMAN]	33976680	0.255056
P02458	Collagen alpha-1(II) chain OS=Homo sapiens GN=COL2A1 PE=1 SV=3 - [CO2A1_HUMAN]	3.19732e+07	0.240016
Q14055	RecName: Full=Collagen alpha-2(IX) chain;Flags: Precursor; - [CO9A2_HUMAN]	3.11631e+07	0.233935
P51884	RecName: Full=Lumican;AltName: Full=Keratan sulfate proteoglycan lumican; Short=KSPG lumican;Flags: Precursor; - [LUM_HUMAN]	2.93079e+07	0.220008
Q16787	RecName: Full=Laminin subunit alpha-3;AltName: Full=Epiligrin 170 kDa subunit; Short=E170;AltName: Full=Epiligrin subunit alpha;AltName: Full=Kalinin subunit alpha;AltName: Full=Laminin-5 subunit alpha;AltName: Full=Laminin-6 subunit alpha;AltName: Full=Laminin-7 subunit alpha;AltName: Full=Nicein subunit alpha;Flags: Precursor; - [LAMA3_HUMAN]	26832979	0.201429
P04004	Vitronectin OS=Homo sapiens GN=VTN PE=1 SV=1 - [VTNC_HUMAN]	2.24537e+07	0.168555
Q99715	RecName: Full=Collagen alpha-1(XII) chain;Flags: Precursor; - [COCA1_HUMAN]	1.76506e+07	0.132499
	Total	1.33213e+10	100
